# Supplementary material
Source: Elsevier journal article supplement (https://www.sciencedirect.com/science/article/pii/S1695403320305270)
Supplement: mmc1 [file S1695403320305270:mmc1.doc]

**ANEXO**

Este manuscrito ha sido revisado en su versión final por Lourdes Cabrera García e Ignacio Díez López, ambos miembros del Comité de Medicamentos de la Asociación Española de Pediatría.
